# Supplementary material for: Biochar, Bentonite and Zeolite Supplemented Feeding of Layer Chickens Alters Intestinal Microbiota and Reduces Campylobacter Load
Source: PubMed Central journal article supplement (PMC4845986; doi:10.1371/journal.pone.0154061), 2016-04-26
Supplement: pone.0154061.s001.pdf [file pone.0154061.s001.pdf]

**Biochar, bentonite and zeolite supplemented feeding of layer chickens  
alters intestinal microbiota and reduces *Campylobacter* load**

Tanka P. Prasai<sup>1</sup>, Kerry B. Walsh<sup>1</sup>, Surya P. Bhattarai<sup>1</sup>, David J. Midmore<sup>1</sup>, Thi T. H. Van<sup>2</sup>,  
Robert J. Moore<sup>2,3</sup>, Dragana Stanley<sup>1\*</sup>

**Supplementary Material**

<sup>1</sup>Central Queensland University, Institute for Future Farming Systems, Rockhampton, Queensland, Australia.

<sup>2</sup>RMIT University, School of Applied Sciences and Health Innovations Research Institute (HIRI), Bundoora, Victoria, Australia.

<sup>3</sup>Department of Microbiology, Monash University, Clayton, Victoria Australia.

**Corresponding author**

Dragana Stanley

Central Queensland University

Bruce Highway

School of Medical and Applied Sciences

Building 6 Room 2.33

Rockhampton QLD 4702

Email: D.Stanley@cqu.edu.au

Phone: +61 7 4923 2079

Fig. A

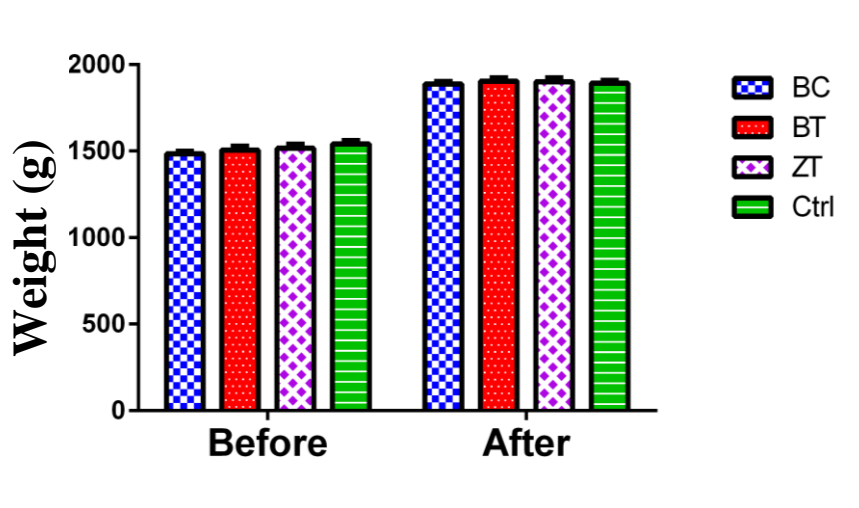

**Fig. A: Bird weights were not different between the treatment groups before ( $p=0.0284$ ) or after ( $p=0.905$ ) 23 weeks of the diet treatment. The bars represent standard error.**

Fig. B

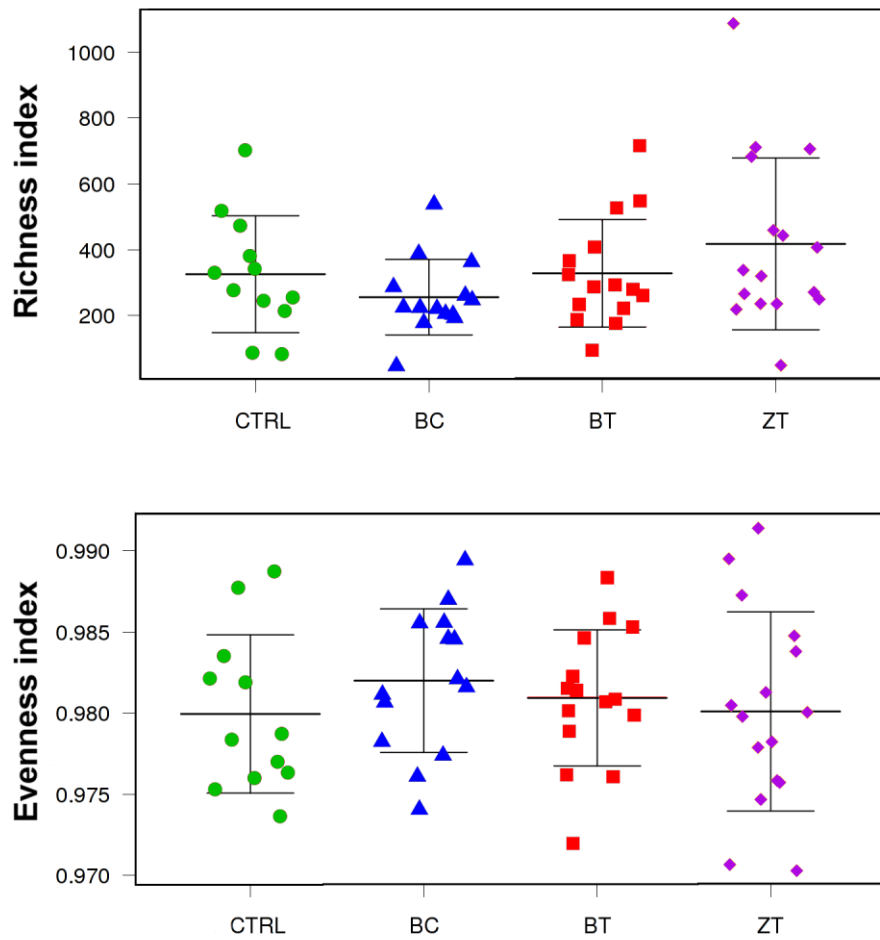

**Fig. B: Addition of biochar (BC), bentonite (BT) and zeolite (ZT) to feed did not influence richness and diversity of the intestinal microbiota compared to un-supplemented control (CTRL). Top graph represents richness and bottom graph evenness index. Neither index were significantly ( $p < 0.05$ ) altered with additives.**

Fig. C

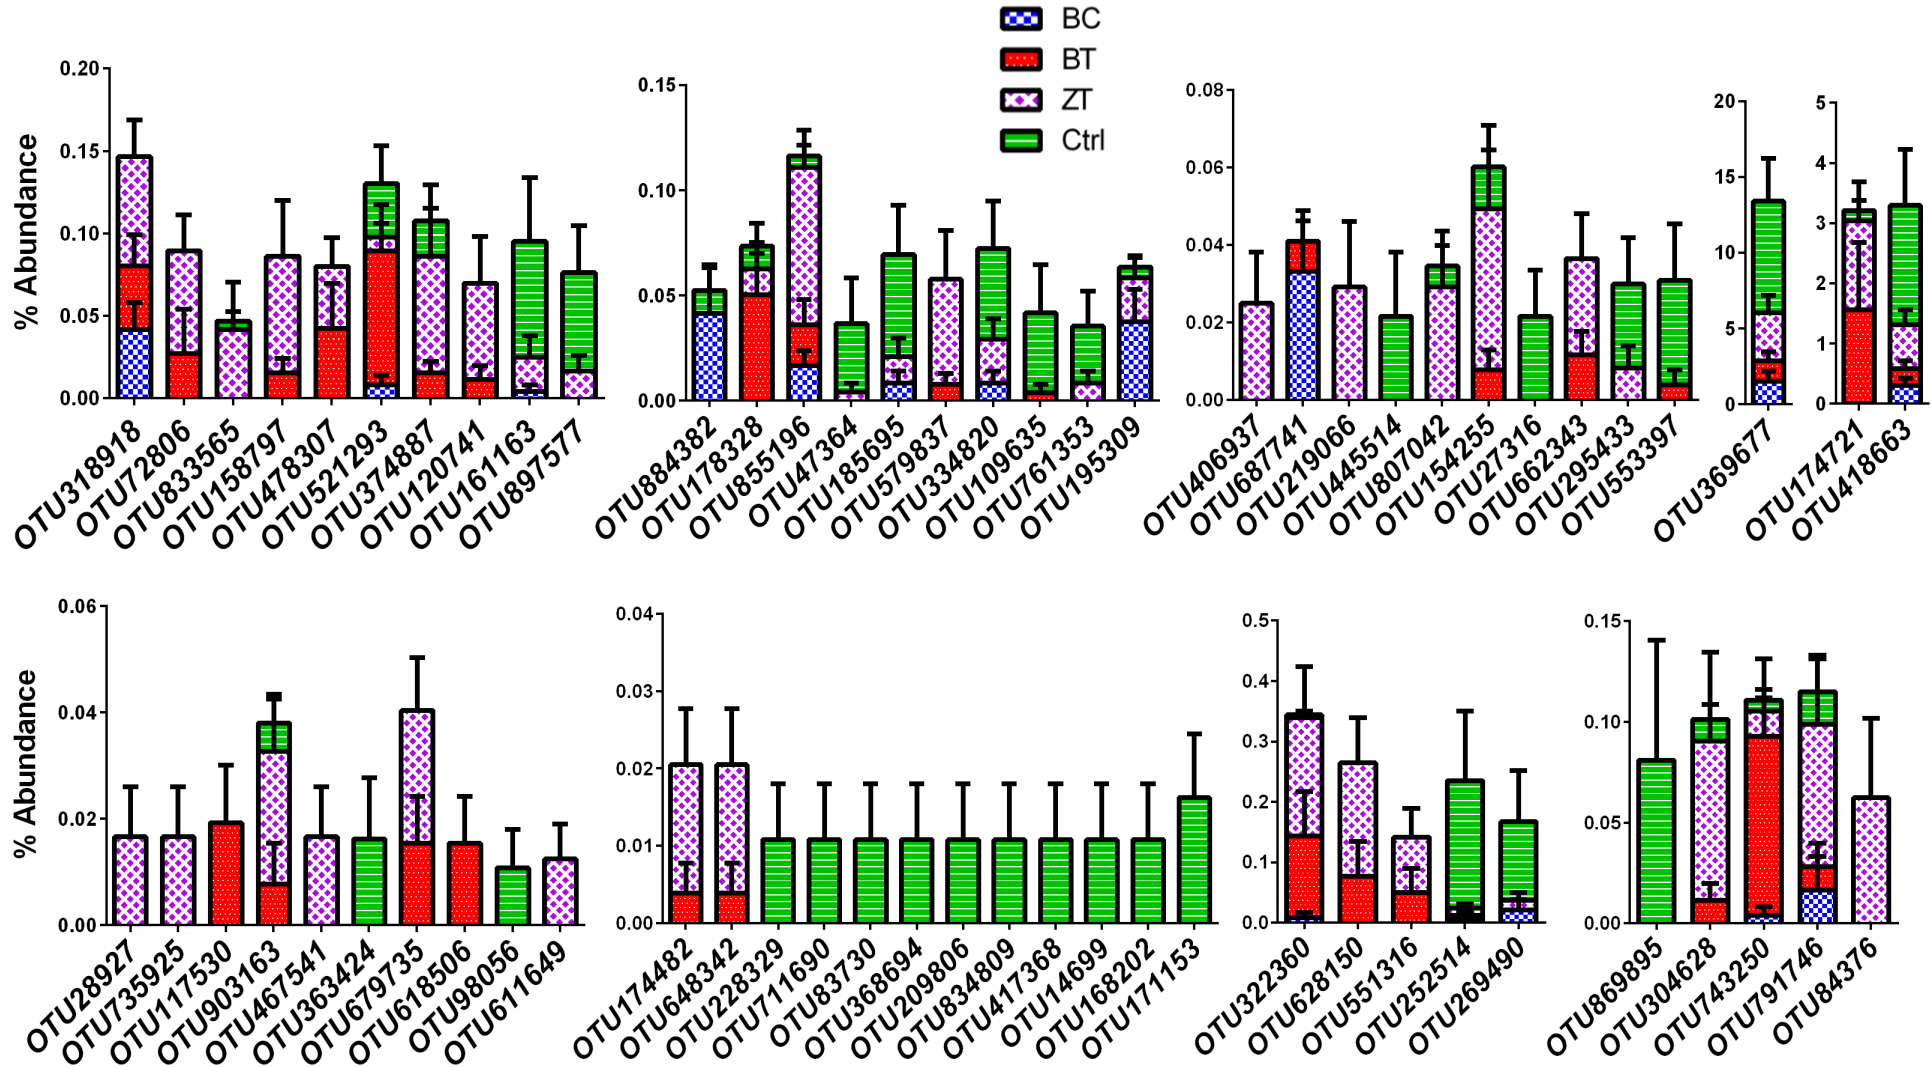

Fig. C: OTUs differentially abundant (QIIME based ANOVA) between the diet treatment groups. *P*-values and closest blast aligned strain from 16S Microbial database are given in the Table D. The bars represent standard error for  $n > 12$ .

**Table A: Composition of the layer diets (%w/w)**

|                              | Control | Biochar<br>4 % | Zeolite<br>4 % | Bentonite<br>4 % |
|------------------------------|---------|----------------|----------------|------------------|
| Dry matter (%)               | 90.37   | 90.70          | 90.63          | 90.67            |
| Crude fat (%)                | 4.09    | 4.29           | 4.25           | 4.19             |
| Crude ash (%)                | 13.06   | 16.68          | 16.34          | 16.83            |
| Crude fibre (%)              | 3.17    | 3.02           | 2.68           | 2.38             |
| Metabolisable energy (MJ/kg) | 11.75   | 11.40          | 11.53          | 11.50            |
| Crude protein (%)            | 17.91   | 17.74          | 17.81          | 17.52            |
| Calcium (%)                  | 4.23    | 4.27           | 4.25           | 4.30             |
| Phosphorus available (%)     | 0.47    | 0.45           | 0.46           | 0.45             |
| Lysine (%)                   | 0.91    | 0.94           | 0.99           | 1.00             |
| Methionine (%)               | 0.45    | 0.43           | 0.45           | 0.45             |
| Methionine plus cysteine (%) | 0.68    | 0.66           | 0.69           | 0.69             |

Poultry premix provided per kilogram of diet; Vitamin A, 15000 IU; Vitamin D3, 5,000 IU; Vitamin E, 50 mg; Vitamin K3, 10 mg; thiamine, 4 mg; riboflavin 8 mg; pyridoxine, 5 mg; Vitamin B12, 0.025; niacin, 50 mg; Ca-pantothenate, 20 mg; folic acid, 2 mg; biotin, 0.25 mg; ascorbic acid, 75 mg; choline, 175 mg; Mg, 35 mg; Mn, 56 mg; Zn, 140 mg; Fe, 56 mg; Cu, 10.5 mg; I, 1 mg; Co, 0.28 mg; Se, 0.28 mg; Mo, 0.7 mg

**Table B: Sodium Bentonite Typical Chemical (oxide) analyses (dry basis)**

|                                |        |                                |       |
|--------------------------------|--------|--------------------------------|-------|
| SiO <sub>2</sub>               | 66.80% | K <sub>2</sub> O               | 0.49% |
| Al <sub>2</sub> O <sub>3</sub> | 22.30% | TiO <sub>2</sub>               | 0.48% |
| Fe <sub>2</sub> O <sub>3</sub> | 3.26%  | Mn <sub>3</sub> O <sub>4</sub> | 0.01% |
| CaO                            | 1.48%  | SO <sub>3</sub>                | 0.08% |
| MgO                            | 2.59%  | P <sub>2</sub> O <sub>5</sub>  | 0.05% |
| Na <sub>2</sub> O              | 2.48%  | BaO                            | 0.08% |

| Cation Exchange Capacity |               |
|--------------------------|---------------|
| Minimum                  | 70meq/100mg   |
| Average                  | 76meq/100mg   |
| pH                       | Average 10.2  |
| Physical Properties      |               |
| Grit Content             | <3.0%         |
| Total Moisture           | Maximum 10.5% |
| Bulk Density             | 1.2kg/1       |

| Exchangeable    | Cations |
|-----------------|---------|
| Sodium          | 65.60%  |
| Calcium         | 20.20%  |
| Magnesium       | 12.40%  |
| Potassium       | 1.80%   |
| Sizing Analysis |         |
| -2 mm           | 15%     |
| -1.0 + 0.5 mm   | 32%     |
| -0.5 mm         | 53%     |

**Table C: Egg productivity and feed conversion ratio (FCR) across the 23 weeks of amended diet**

| Treatment     | Egg production (% hens/day) | Average egg weight (g) | Egg mass yield (g/hen/day) | Feed intake (g/hen/day) | FCR (g feed/g egg) | Peak egg yield (% hens/day) |
|---------------|-----------------------------|------------------------|----------------------------|-------------------------|--------------------|-----------------------------|
| Biochar 4 %   | 84.8                        | 61.0                   | 51.7                       | 109.7                   | 2.12               | 89.3                        |
| Bentonite 4 % | 85.2                        | 61.9                   | 52.7                       | 116.3                   | 2.20               | 87.1                        |
| Zeolite 4 %   | 85.8                        | 62.3                   | 53.5                       | 116.2                   | 2.17               | 88.6                        |
| Control       | 83.6                        | 59.2                   | 49.4                       | 118.6                   | 2.40               | 87.3                        |
| SEM           | 0.492                       | 0.41                   | 0.389                      | 0.238                   | 0.014              | 0.938                       |
| P values      | 0.053                       | 0.03                   | 0.001                      | 0.001                   | 0.007              | 0.366                       |

\* P values are based on Analysis of variance (ANOVA) for 20 birds in 4 pens for each treatment

Egg mass yield is calculated as egg production x average egg weight

FCR is calculated as feed intake / egg mass yield

Peak egg yield is the highest recorded

**Table D:** OTUs differentially abundant (Qiime based ANOVA, shown in S3 Fig.) between the diet treatment groups. The best blastn aligned strain and % ID against 16S Microbial database are given followed with Qiime derived blastn GreenGenes taxonomy assignment.

| OTU ID    | p-Value | Blastn against 16S Microbial database                                     | %ID | Qiime GreenGenes assignment                                                                                    |
|-----------|---------|---------------------------------------------------------------------------|-----|----------------------------------------------------------------------------------------------------------------|
| OTU369677 | 0.028   | <i>Gallibacterium anatis</i> UMN179 strain UMN179                         | 100 | Proteobacteria/Gammaproteobacteria/Pasteurellales/Pasteurellaceae/ <i>Gallibacterium/Gallibacterium anatis</i> |
| OTU174721 | 0.050   | <i>Clostridium fimetarium</i> strain Z-2189                               | 94  | Firmicutes/Clostridia/Clostridiales/Lachnospiraceae                                                            |
| OTU418663 | 0.005   | <i>Gallibacterium anatis</i> strain F 149                                 | 99  | Proteobacteria/Gammaproteobacteria/Pasteurellales/Pasteurellaceae/ <i>Gallibacterium/Gallibacterium anatis</i> |
| OTU322360 | 0.037   | <i>Ruminococcus lactaris</i> strain ATCC 29176                            | 94  | Firmicutes/Clostridia/Clostridiales/Lachnospiraceae                                                            |
| OTU252514 | 0.025   | <i>Rothia nasimurium</i> strain CCUG 35957                                | 91  | Actinobacteria/Actinobacteria/Actinomycetales/Micrococcaceae/ <i>Rothia</i>                                    |
| OTU269490 | 0.011   | <i>Campylobacter jejuni</i> subsp. <i>jejuni</i> NCTC 11168 = ATCC 700819 | 100 | Proteobacteria/Epsilonproteobacteria/Campylobacteriales/Campylobacteraceae/ <i>Campylobacter</i>               |
| OTU628150 | 0.035   | <i>Clostridium populeti</i> strain 743A                                   | 94  | Firmicutes/Clostridia/Clostridiales/Lachnospiraceae                                                            |
| OTU551316 | 0.014   | <i>Clostridium algidixylanolyticum</i> strain SPL73                       | 95  | Firmicutes/Clostridia/Clostridiales/Lachnospiraceae/ <i>Clostridium</i>                                        |
| OTU869895 | 0.028   | <i>Clostridium orbiscindens</i> DSM 6740 strain 265                       | 96  | Firmicutes/Clostridia/Clostridiales/Ruminococcaceae/ <i>Clostridium</i>                                        |
| OTU304628 | 0.021   | <i>Lactobacillus crispatus</i> ST1 strain ST1                             | 95  | Firmicutes/Bacilli/Lactobacillales/Lactobacillaceae/ <i>Lactobacillus/Lactobacillus helveticus</i>             |
| OTU743250 | 0.037   | <i>Aminobacter niigataensis</i> strain DSM7050                            | 97  | Proteobacteria/Alphaproteobacteria/Rhizobiales/Phyllobacteriaceae                                              |
| OTU791746 | 0.023   | <i>Corynebacterium amycolatum</i> strain CIP 103452                       | 97  | Actinobacteria/Actinobacteria/Actinomycetales/Corynebacteriaceae/ <i>Corynebacterium</i>                       |
| OTU84376  | 0.009   | <i>Phascolarctobacterium faecium</i> strain ACM 3679                      | 90  | Firmicutes/Clostridia/Clostridiales/Veillonellaceae/ <i>Phascolarctobacterium</i>                              |
| OTU72806  | 0.019   | <i>Actinomyces nasicola</i> strain R2014                                  | 90  | Actinobacteria/Actinobacteria/Actinomycetales/Actinomycetaceae/ <i>Actinomyces/Actinomyces marimammalium</i>   |
| OTU833565 | 0.037   | <i>Peptoniphilus ivorii</i> strain DSM 10022                              | 92  | Firmicutes/Clostridia/Clostridiales/ClostridialesFamilyXI.IncertaeSedis/ <i>Peptoniphilus</i>                  |
| OTU158797 | 0.032   | <i>Ruminococcus lactaris</i> strain ATCC 29176                            | 95  | Firmicutes/Clostridia/Clostridiales/Lachnospiraceae                                                            |
| OTU478307 | 0.037   | <i>Clostridium fimetarium</i> strain Z-2189                               | 91  | Firmicutes/Clostridia/Clostridiales/Lachnospiraceae                                                            |
| OTU521293 | 0.007   | <i>Ralstonia syzygii</i> strain ATCC 49543                                | 97  | Proteobacteria/Betaproteobacteria/Burkholderiales/Oxalobacteraceae                                             |
| OTU374887 | 0.022   | <i>Actinomyces nasicola</i> strain R2014                                  | 90  | Actinobacteria/Actinobacteria/Actinomycetales/Actinomycetaceae                                                 |
| OTU120741 | 0.029   | <i>Atopobium parvulum</i> DSM 20469 strain DSM 20469                      | 93  | Actinobacteria/Actinobacteria/Coriobacteriales/Coriobacteriaceae                                               |
| OTU161163 | 0.024   | <i>Gallibacterium anatis</i> UMN179 strain UMN179                         | 89  | Proteobacteria/Gammaproteobacteria/Pasteurellales/Pasteurellaceae/ <i>Gallibacterium/Gallibacterium anatis</i> |
| OTU897577 | 0.042   | <i>Actinomyces nasicola</i> strain R2014                                  | 87  | Actinobacteria/Actinobacteria/Actinomycetales/Actinomycetaceae                                                 |

| OTU ID    | p-Value | Blastn against 16S Microbial database                          | %ID | Qiime GreenGenes assignment                                                                                        |
|-----------|---------|----------------------------------------------------------------|-----|--------------------------------------------------------------------------------------------------------------------|
| OTU318918 | 0.040   | <i>Actinomyces europaeus</i> strain CCUG 32789A                | 93  | Actinobacteria/Actinobacteria/Actinomycetales/Actinomycetaceae/ <i>Actinomyces/Actinomyces europaeus</i>           |
| OTU884382 | 0.029   | <i>Enterococcus cecorum</i> strain ATCC 43198                  | 98  | Firmicutes/Bacilli/Lactobacillales/Enterococcaceae/ <i>Enterococcus/Enterococcus cecorum</i>                       |
| OTU178328 | 0.046   | <i>Naxibacter varians</i> strain : CCUG 35299                  | 99  | Proteobacteria/Betaproteobacteria/Burkholderiales/Oxalobacteraceae/ <i>Massilia/Massilia timonae</i>               |
| OTU855196 | 0.043   | <i>Actinomyces europaeus</i> strain CCUG 32789A                | 93  | Actinobacteria/Actinobacteria/Actinomycetales/Actinomycetaceae/ <i>Actinomyces/Actinomyces europaeus</i>           |
| OTU47364  | 0.039   | <i>Varibaculum cambriense</i> strain CCUG 44998                | 92  | Actinobacteria/Actinobacteria/Actinomycetales/Actinomycetaceae/ <i>Varibaculum/Varibaculum cambriense</i>          |
| OTU185695 | 0.037   | <i>Actinomyces nasicola</i> strain R2014                       | 91  | Actinobacteria/Actinobacteria/Actinomycetales/Bogoriellaceae/ <i>Georgenia</i>                                     |
| OTU579837 | 0.037   | <i>Ruminococcus lactaris</i> strain ATCC 29176                 | 96  | Firmicutes/Clostridia/Clostridiales/Lachnospiraceae                                                                |
| OTU334820 | 0.029   | <i>Helcococcus sueciensis</i> strain CCUG 47334                | 87  | Firmicutes/Clostridia/Clostridiales/ClostridialesFamilyXI.IncertaeSedis/ <i>Helcococcus</i>                        |
| OTU109635 | 0.001   | <i>Gallibacterium anatis</i> UMN179 strain UMN179              | 97  | Proteobacteria/Gammaproteobacteria/Pasteurellales/Pasteurellaceae/ <i>Gallibacterium/Gallibacterium genom sp.1</i> |
| OTU761353 | 0.036   | <i>Actinomyces canis</i> strain CCUG 41706                     | 93  | Actinobacteria/Actinobacteria/Actinomycetales/Actinomycetaceae/ <i>Actinomyces</i>                                 |
| OTU195309 | 0.035   | <i>Actinomyces europaeus</i> strain CCUG 32789A                | 93  | Actinobacteria/Actinobacteria/Actinomycetales/Actinomycetaceae/ <i>Actinomyces/Actinomyces europaeus</i>           |
| OTU406937 | 0.026   | <i>Actinomyces europaeus</i> strain CCUG 32789A                | 93  | Actinobacteria/Actinobacteria/Actinomycetales/Actinomycetaceae/ <i>Actinomyces/Actinomyces europaeus</i>           |
| OTU687741 | 0.004   | <i>Barnesiella intestinihominis</i> YIT 11860 strain YIT 11860 | 88  | Bacteroidetes/Bacteroidia/Bacteroidales                                                                            |
| OTU219066 | 0.033   | <i>Ruminococcus lactaris</i> strain ATCC 29176                 | 97  | Firmicutes/Clostridia/Clostridiales/Lachnospiraceae                                                                |
| OTU445514 | 0.005   | <i>Clostridium xylanolyticum</i> strain DSM 6555               | 92  | Firmicutes/Clostridia/Clostridiales/Lachnospiraceae                                                                |
| OTU807042 | 0.049   | <i>Parasporobacterium paucivorans</i> strain SYR1              | 90  | Firmicutes/Clostridia/Clostridiales/Lachnospiraceae                                                                |
| OTU154255 | 0.049   | <i>Ruminococcus torques</i> strain VPI B2-51                   | 86  | Firmicutes/Clostridia/Clostridiales/Lachnospiraceae/ <i>Ruminococcus</i>                                           |
| OTU27316  | 0.049   | <i>Actinomyces canis</i> strain CCUG 41706                     | 90  | Actinobacteria/Actinobacteria/Actinomycetales/Actinomycetaceae                                                     |
| OTU662343 | 0.045   | <i>Actinomyces europaeus</i> strain CCUG 32789A                | 94  | Actinobacteria/Actinobacteria/Actinomycetales/Actinomycetaceae/ <i>Actinomyces/Actinomyces europaeus</i>           |
| OTU295433 | 0.046   | <i>Rothia nasimurium</i> strain CCUG 35957                     | 92  | Actinobacteria/Actinobacteria/Actinomycetales/Micrococcaceae/ <i>Rothia</i>                                        |
| OTU553397 | 0.044   | <i>Enterococcus avium</i> strain E6844                         | 88  | Actinobacteria/Actinobacteria/Actinomycetales/Micrococcaceae/ <i>Rothia</i>                                        |
| OTU28927  | 0.045   | <i>Barnesiella intestinihominis</i> YIT 11860 strain YIT 11860 | 78  | Bacteroidetes/Bacteroidia/Bacteroidales                                                                            |
| OTU735925 | 0.044   | <i>Paraprevotella clara</i> YIT 11840 strain YIT 11840         | 87  | Bacteroidetes/Bacteroidia/Bacteroidales/Prevotellaceae/ <i>Prevotella</i>                                          |
| OTU117530 | 0.042   | <i>Clostridium sartagoforme</i> strain DSM 1292                | 94  | Firmicutes/Clostridia/Clostridiales/Clostridiaceae/ <i>Clostridium/Clostridium perfringens</i>                     |
| OTU903163 | 0.042   | <i>Peptoniphilus ivorii</i> strain DSM 10022                   | 88  | Firmicutes/Clostridia/Clostridiales/ClostridialesFamilyXI.IncertaeSedis/ <i>Peptoniphilus</i>                      |
| OTU467541 | 0.019   | <i>Clostridium celerecrescens</i> strain DSM 5628              | 96  | Firmicutes/Clostridia/Clostridiales/Lachnospiraceae                                                                |



| OTU ID    | p-Value | Blastn against 16S Microbial database                 | %ID | Qiime GreenGenes assignment                                                                                    |
|-----------|---------|-------------------------------------------------------|-----|----------------------------------------------------------------------------------------------------------------|
| OTU363424 | 0.033   | <i>Clostridium methylpentosum</i> DSM 5476 strain R2  | 90  | Firmicutes/Clostridia/Clostridiales/Ruminococcaceae/ <i>Clostridium</i>                                        |
| OTU679735 | 0.037   | <i>Faecalibacterium prausnitzii</i> strain ATCC 27768 | 90  | Firmicutes/Clostridia/Clostridiales/Ruminococcaceae/ <i>Faecalibacterium</i>                                   |
| OTU618506 | 0.037   | <i>Balneimonas flocculans</i> strain TFB              | 99  | Proteobacteria/Alphaproteobacteria/Rhizobiales/ <i>Bradyrhizobiaceae</i>                                       |
| OTU98056  | 0.039   | <i>Actinomyces marimammalium</i> strain CCUG 41710    | 88  | Actinobacteria/Actinobacteria/Actinomycetales/Actinomycetaceae/ <i>Actinomyces</i>                             |
| OTU611649 | 0.003   | <i>Actinomyces europaeus</i> strain CCUG 32789A       | 95  | Actinobacteria/Actinobacteria/Actinomycetales/Actinomycetaceae/ <i>Actinomyces/Actinomyces europaeus</i>       |
| OTU228329 | 0.026   | <i>Rothia terrae</i> strain L-143                     | 93  | Actinobacteria/Actinobacteria/Actinomycetales/Micrococcaceae/ <i>Kocuria</i>                                   |
| OTU174482 | 0.009   | <i>Galbibacter mesophilus</i> strain Mok-17           | 84  | Bacteroidetes/Bacteroidia/Bacteroidales                                                                        |
| OTU711690 | 0.013   | <i>Bacteroides dorei</i> DSM 17855 strain JCM 13471   | 99  | Bacteroidetes/Bacteroidia/Bacteroidales/Bacteroidaceae/ <i>Bacteroides/Bacteroides dorei</i>                   |
| OTU83730  | 0.037   | <i>Clostridium saccharogumia</i> strain SDG-Mt85-3Db  | 86  | Firmicutes/Clostridia/Clostridiales/Clostridiaceae/ <i>Clostridium</i>                                         |
| OTU368694 | 0.040   | <i>Actinomyces cardiffensis</i> strain CCUG 44997     | 85  | Firmicutes/Clostridia/Clostridiales/ClostridialesFamilyXI.IncertaeSedis/ <i>Peptoniphilus</i>                  |
| OTU209806 | 0.032   | <i>Clostridium aldenense</i> strain RMA 9741          | 96  | Firmicutes/Clostridia/Clostridiales/Lachnospiraceae                                                            |
| OTU648342 | 0.020   | <i>Clostridium sporosphaeroides</i> strain DSM 1294   | 91  | Firmicutes/Clostridia/Clostridiales/Ruminococcaceae                                                            |
| OTU834809 | 0.014   | <i>Faecalibacterium prausnitzii</i> strain ATCC 27768 | 94  | Firmicutes/Clostridia/Clostridiales/Ruminococcaceae/ <i>Faecalibacterium</i>                                   |
| OTU417368 | 0.037   | <i>Clostridium methylpentosum</i> DSM 5476 strain R2  | 87  | Firmicutes/Clostridia/Clostridiales/Ruminococcaceae/ <i>Ruminococcus</i>                                       |
| OTU14699  | 0.004   | <i>Serratia marcescens</i> WW4 strain WW4             | 87  | Proteobacteria/Gammaproteobacteria/Enterobacteriales/ <i>Enterobacteriaceae</i>                                |
| OTU168202 | 0.008   | <i>Corynebacterium xerosis</i> strain ATCC 373        | 88  | Proteobacteria/Gammaproteobacteria/Pasteurellales/Pasteurellaceae/ <i>Gallibacterium/Gallibacterium anatis</i> |
| OTU171153 | 0.036   | <i>Gallibacterium anatis</i> UMN179 strain UMN179     | 97  | Proteobacteria/Gammaproteobacteria/Pasteurellales/Pasteurellaceae/ <i>Gallibacterium/Gallibacterium anatis</i> |
